# Supplementary material for: Genome editing of an African elite rice variety confers resistance against endemic and emerging Xanthomonas oryzae pv. oryzae strains
Source: eLife. 2023 Jun 20;12:e84864. doi: 10.7554/eLife.84864 (PMC10322153; doi:10.7554/eLife.84864)
Supplement: Source data 1. [file elife-84864-data1.xlsx]

## Sheet: Feuil1
Figure/ Table name	IRD	HHU	file name	Type
Table 1	X		Table 1_source data 1	quantification of lesion length, csv file
Fig 2	X		Figure 2_source data 1	quantification of lesion length, csv file
Fig 2 Suppl 1	X		Figure 2_supplement 1_source data 1	quantification of lesion length, csv file
Fig 2 Suppl 2	X		Figure 2_supplement 2_source data 1	quantification of lesion length, csv file
			Figure 2_supplement 3B_source data 1	raw gel pictures, unlabeled, jpeg
			Figure 2_supplement 3B_source data 2	raw gel pictures,labeled, jpeg
			Figure 2_supplement 3C_source data 1	Phylogenetic analysis, raw gel pictures, Sequencing files, Tif, fasta, ab1, jpeg
			Figure 2_supplement 3D_source data 1	raw gel pictures, unlabeled, jpeg
			Figure 2_supplement 3D_source data 2	raw gel pictures,labeled, jpeg
			Figure 2_supplement 3E_source data 1	Phylogenetic analysis, raw gel pictures, Sequencing files, Tif, fasta, ab1, jpeg
Fig 3	X		Figure 3_source data 1	Sequencing files, fasta
Fig 4	X		Figure 4A_source data 1	quantification of lesion length, csv file
	X		Figure 4B_source data 1	qRT values, csv
Fig 5		X	Figure 5A_source data 1	Rice leaf images or leasion length, experiment 1, jpeq
			Figure 5A_source data 2	Rice leaf images or leasion length, experiment 2, jpeq
			Figure 5A_source data 3	Rice leaf images or leasion length, experiment 3, jpeq
			Figure 5A_source data 4	quantification of lesion length, csv file
			Figure 5B_source data 1	Sequencing files SWT14 Komboka, fasta, ab1
Fig 5 Suppl 1		X	Figure 5_supplement 1_source data 1	Sequencing files of Komboka & Kitaake SWT11,13,14 fasta
Fig 5 Suppl 2		X	Figure 5_supplement 2_source data 1_pMUGW5	plasmid map of pMUGW5
Fig 5 Suppl 3		X	Figure 5_supplement 3_source data 1	Sequencing files SWT11 Komboka, fasta, ab1
		X	Figure 5_supplement 3_source data 2	Sequencing files SWT13 Komboka, fasta, ab1
		X	Figure 5_supplement 3_source data 3	Sequencing files SWT14 Komboka, fasta, ab1
Fig 6		X	Figure 6A_source data 1	Sequencing files SWT11, SWT13, SWT14 Komboka, fasta, ab1
		X	Figure 6B_source data 1	quantification of lesion length, csv file
		X	Figure 6B_source data 2	Rice leaf images or leasion length, experiment 1, jpeq
		X	Figure 6B_source data 3	Rice leaf images or leasion length, experiment 2, jpeq
		X	Figure 6B_source data 4	Rice leaf images or leasion length, experiment 3, jpeq
Fig 7	X		Figure 7_source data 1	quantification of lesion length, csv file
Fig 7 Suppl 1	X		Figure 7_supplement 1_source data 1	qRT values, csv
Supplemetary file 1k		X	Supplementary file 1k_source data 1	Sequencing files SWT11 Komboka, fasta, ab1
		X	Supplementary file 1k_source data 2	Sequencing files SWT13 Komboka, fasta, ab1
		X	Supplementary file 1k_source data 3	Sequencing files SWT14 Komboka, fasta, ab1
		X	Supplementary file 1k_source data 4	ddPCR values, csv
		X	Supplementary file 1k_source data 5	ddPCR values, csv
