# Supplementary material for: Genome editing of an African elite rice variety confers resistance against endemic and emerging Xanthomonas oryzae pv. oryzae strains
Source: eLife. 2023 Jun 20;12:e84864. doi: 10.7554/eLife.84864 (PMC10322153; doi:10.7554/eLife.84864)
Supplement: Supplementary file 2. [file elife-84864-supp2.xlsx]

## Sheet: assemblies_metadata_parsnp_tale
stn_label	New name	ncbi_strain	ncbi_gb_acc	ncbi_refseq_acc	ncbi_taxo_id	species	pathovar	country	subregion	continent	host	seq_tech	tot_seq_length	ncbi_asm_level	ncbi_scaffolds_count
CIX4462	iTzDak19-3	CIX4462	GCA_029204285.1	NA	64187	Xanthomonas oryzae pv. oryzae	oryzae	Tanzania	Eastern Africa	Africa	Oryza sativa	Oxford Nanopore + Illumina NextSeq	5150745	Complete Genome	1
CIX4506	iTzLuk21-1	CIX4506	GCA_029204265.1	NA	64187	Xanthomonas oryzae pv. oryzae	oryzae	Tanzania	Eastern Africa	Africa	Oryza sativa	Oxford Nanopore + Illumina NextSeq	5109772	Complete Genome	1
CIX4509	iTzLuk21-2	CIX4509	GCA_029204245.1	NA	64187	Xanthomonas oryzae pv. oryzae	oryzae	Tanzania	Eastern Africa	Africa	Oryza sativa	Oxford Nanopore + Illumina NextSeq	5144900	Complete Genome	1
CIX4457	iTzDak19-1	CIX4457	GCA_030033735.1	NA	64187	Xanthomonas oryzae pv. oryzae	oryzae	Tanzania	Eastern Africa	Africa	Oryza sativa	Oxford Nanopore + Illumina NextSeq	5175541	Contig	3
CIX4458	iTzDak19-2	CIX4458	GCA_030033715.1	NA	64187	Xanthomonas oryzae pv. oryzae	oryzae	Tanzania	Eastern Africa	Africa	Oryza sativa	Oxford Nanopore + Illumina NextSeq	5129667	Contig	2
CIX4505	iTzDak21-3	CIX4505	GCA_030033655.1	NA	64187	Xanthomonas oryzae pv. oryzae	oryzae	Tanzania	Eastern Africa	Africa	Oryza sativa	Oxford Nanopore + Illumina NextSeq	5139302	Contig	2
CIX4507	iTzLuk21-4	CIX4507	GCA_029224685.1	NA	64187	Xanthomonas oryzae pv. oryzae	oryzae	Tanzania	Eastern Africa	Africa	Oryza sativa	Oxford Nanopore + Illumina NextSeq	5134670	Contig	2
CIX4508	iTzLuk21-5	CIX4508	GCA_030056695.1	NA	64187	Xanthomonas oryzae pv. oryzae	oryzae	Tanzania	Eastern Africa	Africa	Oryza sativa	Oxford Nanopore + Illumina NextSeq	5131688	Chromosome	1
TzDak18-1		NA	NA	NA	64187	Xanthomonas oryzae pv. oryzae	oryzae	Tanzania	Eastern Africa	Africa	Oryza sativa	PacBio	NA	NA	NA
#2		#2	GCA_003295725.1	GCF_003295725.1	64187	Xanthomonas oryzae pv. oryzae	oryzae	China	China	Asia	rice	Illumina HiSeq	4563358	Scaffold	440
0-9		0-9	GCA_009660205.1	GCF_009660205.1	129394	Xanthomonas oryzae pv. oryzicola	oryzicola	China	China	Asia	NA	PacBio Sequel	4830088	Complete Genome	1
172		172	GCA_003298455.1	GCF_003298455.1	64187	Xanthomonas oryzae pv. oryzae	oryzae	China	China	Asia	rice	Illumina HiSeq	4627452	Scaffold	426
26		26	GCA_003295735.1	GCF_003295735.1	64187	Xanthomonas oryzae pv. oryzae	oryzae	China	China	Asia	rice	Illumina HiSeq	4565836	Scaffold	426
296		296	GCA_003298365.1	GCF_003298365.1	64187	Xanthomonas oryzae pv. oryzae	oryzae	China	China	Asia	rice	Illumina HiSeq	4612883	Scaffold	438
AH1		AH1	GCA_003295705.1	GCF_003295705.1	64187	Xanthomonas oryzae pv. oryzae	oryzae	China	China	Asia	rice	Illumina HiSeq	4494699	Scaffold	458
AH11		AH11	GCA_003298245.1	GCF_003298245.1	64187	Xanthomonas oryzae pv. oryzae	oryzae	China	China	Asia	rice	Illumina HiSeq	4634617	Scaffold	421
AH28		AH28	GCA_018310515.1	GCF_018310515.1	347	Xanthomonas oryzae	NA	China	China	Asia	rice	Oxford Nanopore	4965166	Complete Genome	2
AH8		AH8	GCA_003295645.1	GCF_003295645.1	64187	Xanthomonas oryzae pv. oryzae	oryzae	China	China	Asia	rice	Illumina HiSeq	4632646	Scaffold	448
ATCC35933		ATCC 35933	GCA_000482445.1	GCF_000482445.1	1313303	Xanthomonas oryzae ATCC 35933	NA	India	India	Asia	Oryza sativa	Illumina HiSeq 2000	4285634	Scaffold	264
AUST2013		AUST2013	GCA_004355785.1	GCF_004355785.1	64187	Xanthomonas oryzae pv. oryzae	oryzae	Australia	Australia	Oceania	Oryza sativa	PacBio	4958184	Complete Genome	1
AXO1947		AXO1947	GCA_001466505.1	GCF_001466505.1	64187	Xanthomonas oryzae pv. oryzae	oryzae	Cameroon	Middle Africa	Africa	rice	Illumina; PacBio	4674975	Complete Genome	1
B8-12		B8-12	GCA_001042745.1	GCF_001042745.1	129394	Xanthomonas oryzae pv. oryzicola	oryzicola	China	China	Asia	Oryza sativa	PacBio RS II	4794316	Complete Genome	1
BAI15		BAI15	GCA_002189395.1	GCF_002189395.1	129394	Xanthomonas oryzae pv. oryzicola	oryzicola	Burkina Faso	Western Africa	Africa	Oryza sativa	Illumina	4292046	Scaffold	218
BAI20		BAI20	GCA_002189435.1	GCF_002189435.1	129394	Xanthomonas oryzae pv. oryzicola	oryzicola	Burkina Faso	Western Africa	Africa	rice	Illumina	4474693	Scaffold	207
BAI21		BAI21	GCA_002189465.1	GCF_002189465.1	129394	Xanthomonas oryzae pv. oryzicola	oryzicola	Burkina Faso	Western Africa	Africa	Oryza sativa	Illumina	4262194	Scaffold	201
BAI23		BAI23	GCA_004319505.1	GCF_004319505.1	347	Xanthomonas oryzae	NA	Burkina Faso	Western Africa	Africa	Leersia hexandra	PacBio Sequel	4752833	Complete Genome	1
BAI3		BAI3	GCA_003031385.1	GCF_003031385.1	64187	Xanthomonas oryzae pv. oryzae	oryzae	Burkina Faso	Western Africa	Africa	Oryza sativa	PacBio	4723880	Complete Genome	1
BB151-3		BB151-3	GCA_004319485.1	GCF_004319485.1	347	Xanthomonas oryzae	NA	Uganda	Eastern Africa	Africa	Oryza sativa	PacBio Sequel	5204179	Complete Genome	1
BB156-2		BB156-2	GCA_004319465.1	GCF_004319465.1	347	Xanthomonas oryzae	NA	Uganda	Eastern Africa	Africa	Oryza sativa	PacBio Sequel	5069463	Complete Genome	1
BJ84-3		BJ84-3	GCA_003298095.1	GCF_003298095.1	64187	Xanthomonas oryzae pv. oryzae	oryzae	China	China	Asia	rice	Illumina HiSeq	4603108	Scaffold	431
BLS256		BLS256	GCA_000168315.3	GCF_000168315.3	383407	Xanthomonas oryzae pv. oryzicola BLS256	oryzicola	Philippines	Philippines	Asia	NA	PacBio	4831746	Complete Genome	1
BLS279		BLS279	GCA_001042775.1	GCF_001042775.1	129394	Xanthomonas oryzae pv. oryzicola	oryzicola	Philippines	Philippines	Asia	Oryza sativa	PacBio RS II	4790622	Complete Genome	1
BXO1		BXO1	GCA_001927405.1	GCF_001927405.1	64187	Xanthomonas oryzae pv. oryzae	oryzae	India	India	Asia	Oryza sativa	Illumina MiSeq	4409738	Contig	446
BXO2		BXO2	GCA_001927325.1	GCF_001927325.1	64187	Xanthomonas oryzae pv. oryzae	oryzae	India	India	Asia	Oryza sativa	Illumina MiSeq	4239077	Contig	419
BXO25		BXO25	GCA_001927395.1	GCF_001927395.1	64187	Xanthomonas oryzae pv. oryzae	oryzae	India	India	Asia	Oryza sativa	Illumina MiSeq	4262235	Contig	408
BXO33		BXO33	GCA_001927465.1	GCF_001927465.1	64187	Xanthomonas oryzae pv. oryzae	oryzae	India	India	Asia	Oryza sativa	Illumina MiSeq	4274421	Contig	413
BXO34		BXO34	GCA_001927475.1	GCF_001927475.1	64187	Xanthomonas oryzae pv. oryzae	oryzae	India	India	Asia	Oryza sativa	Illumina MiSeq	4287471	Contig	442
BXO407		BXO407	GCA_001927335.1	GCF_001927335.1	64187	Xanthomonas oryzae pv. oryzae	oryzae	India	India	Asia	Oryza sativa	Illumina MiSeq	4371370	Contig	451
BXO416		BXO416	GCA_001927495.1	GCF_001927495.1	64187	Xanthomonas oryzae pv. oryzae	oryzae	India	India	Asia	Oryza sativa	Illumina MiSeq	4237153	Contig	411
BXO432		BXO432	GCA_001927505.1	GCF_001927505.1	64187	Xanthomonas oryzae pv. oryzae	oryzae	India	India	Asia	Oryza sativa	Illumina MiSeq	4295451	Contig	455
BXO439		BXO439	GCA_001927305.1	GCF_001927305.1	64187	Xanthomonas oryzae pv. oryzae	oryzae	India	India	Asia	Oryza sativa	Illumina MiSeq	4240601	Contig	398
BXO447		BXO447	GCA_001927545.1	GCF_001927545.1	64187	Xanthomonas oryzae pv. oryzae	oryzae	India	India	Asia	Oryza sativa	Illumina MiSeq	4276505	Contig	427
BXO454		BXO454	GCA_001927555.1	GCF_001927555.1	64187	Xanthomonas oryzae pv. oryzae	oryzae	India	India	Asia	Oryza sativa	Illumina MiSeq	4213308	Contig	430
BXO471		BXO471	GCA_001927615.1	GCF_001927615.1	64187	Xanthomonas oryzae pv. oryzae	oryzae	India	India	Asia	Oryza sativa	Illumina MiSeq	4242352	Contig	405
BXO512		BXO512	GCA_001928215.1	GCF_001928215.1	64187	Xanthomonas oryzae pv. oryzae	oryzae	India	India	Asia	Oryza sativa f. spontanea	Illumina MiSeq	4261893	Contig	402
BXO554		BXO554	GCA_001927385.1	GCF_001927385.1	64187	Xanthomonas oryzae pv. oryzae	oryzae	India	India	Asia	Oryza sativa f. spontanea	Illumina MiSeq	4289847	Contig	437
BXO557		BXO557	GCA_001927625.1	GCF_001927625.1	64187	Xanthomonas oryzae pv. oryzae	oryzae	India	India	Asia	Oryza sativa f. spontanea	Illumina MiSeq	4250854	Contig	422
BXO558		BXO558	GCA_001928245.1	GCF_001928245.1	64187	Xanthomonas oryzae pv. oryzae	oryzae	India	India	Asia	Oryza sativa f. spontanea	Illumina MiSeq	4258654	Contig	400
BXO559		BXO559	GCA_001927635.1	GCF_001927635.1	64187	Xanthomonas oryzae pv. oryzae	oryzae	India	India	Asia	Oryza sativa f. spontanea	Illumina MiSeq	4249121	Contig	449
BXO571		BXO571	GCA_001927575.1	GCF_001927575.1	64187	Xanthomonas oryzae pv. oryzae	oryzae	India	India	Asia	Oryza sativa f. spontanea	Illumina MiSeq	4268911	Contig	435
BXO582		BXO582	GCA_001928255.1	GCF_001928255.1	64187	Xanthomonas oryzae pv. oryzae	oryzae	India	India	Asia	Oryza sativa f. spontanea	Illumina MiSeq	4271611	Contig	416
BXO589		BXO589	GCA_001927605.1	GCF_001927605.1	64187	Xanthomonas oryzae pv. oryzae	oryzae	India	India	Asia	Oryza sativa f. spontanea	Illumina MiSeq	4255070	Contig	418
BXO590		BXO590	GCA_001928265.1	GCF_001928265.1	64187	Xanthomonas oryzae pv. oryzae	oryzae	India	India	Asia	Oryza sativa f. spontanea	Illumina MiSeq	4217854	Contig	418
BXO6		BXO6	GCA_001927315.1	GCF_001927315.1	64187	Xanthomonas oryzae pv. oryzae	oryzae	India	India	Asia	Oryza sativa	Illumina MiSeq	4274244	Contig	479
BXO8		BXO8	GCA_001927415.1	GCF_001927415.1	64187	Xanthomonas oryzae pv. oryzae	oryzae	India	India	Asia	Oryza sativa	Illumina MiSeq	4316224	Contig	455
BXOR1		BXOR1	GCA_001929305.1	GCF_001929305.1	129394	Xanthomonas oryzae pv. oryzicola	oryzicola	India	India	Asia	Oryza sativa	Illumina MiSeq	4384806	Contig	276
C9-3		C9-3	GCA_019915985.1	GCF_019915985.1	64187	Xanthomonas oryzae pv. oryzae	oryzae	China	China	Asia	rice	PacBio RSII	4924298	Complete Genome	1
CFBP1948		CFBP1948	GCA_004355465.1	GCF_004355465.1	64187	Xanthomonas oryzae pv. oryzae	oryzae	Cameroon	Middle Africa	Africa	Oryza sativa	PacBio RSII	4674931	Complete Genome	1
CFBP1949		CFBP1949	GCA_004355605.1	GCF_004355605.1	64187	Xanthomonas oryzae pv. oryzae	oryzae	Mali	Western Africa	Africa	Oryza sativa	PacBio RSII	4735200	Complete Genome	1
CFBP1951		CFBP1951	GCA_004355445.1	GCF_004355445.1	64187	Xanthomonas oryzae pv. oryzae	oryzae	Mali	Western Africa	Africa	Oryza sativa	PacBio RSII	4704870	Complete Genome	1
CFBP1952		CFBP1952	GCA_004355585.1	GCF_004355585.1	64187	Xanthomonas oryzae pv. oryzae	oryzae	Mali	Western Africa	Africa	Oryza sativa	PacBio RSII	4684818	Complete Genome	1
CFBP2286		CFBP2286	GCA_001042735.1	GCF_001042735.1	129394	Xanthomonas oryzae pv. oryzicola	oryzicola	Malaysia	Malaysia	Asia	Oryza sativa	PacBio RS II	5005993	Complete Genome	2
CFBP7319		CFBP7319	GCA_004355565.1	GCF_004355565.1	64187	Xanthomonas oryzae pv. oryzae	oryzae	Burkina Faso	Western Africa	Africa	Oryza sativa	PacBio RSII	4750772	Complete Genome	1
CFBP7320		CFBP7320	GCA_004355545.1	GCF_004355545.1	64187	Xanthomonas oryzae pv. oryzae	oryzae	Burkina Faso	Western Africa	Africa	Oryza sativa	PacBio RSII	4723891	Complete Genome	1
CFBP7321		CFBP7321	GCA_004355425.1	GCF_004355425.1	64187	Xanthomonas oryzae pv. oryzae	oryzae	Burkina Faso	Western Africa	Africa	Oryza sativa	PacBio RSII	4717270	Complete Genome	1
CFBP7322		CFBP7322	GCA_004355525.1	GCF_004355525.1	64187	Xanthomonas oryzae pv. oryzae	oryzae	Burkina Faso	Western Africa	Africa	Oryza sativa	PacBio RSII	4708755	Complete Genome	1
CFBP7323		CFBP7323	GCA_004355405.1	GCF_004355405.1	64187	Xanthomonas oryzae pv. oryzae	oryzae	Niger	Western Africa	Africa	Oryza sativa	PacBio RSII	4725822	Complete Genome	1
CFBP7324		CFBP7324	GCA_004355505.1	GCF_004355505.1	64187	Xanthomonas oryzae pv. oryzae	oryzae	Niger	Western Africa	Africa	Oryza sativa	PacBio RSII	4723924	Complete Genome	1
CFBP7325		CFBP7325	GCA_004355385.1	GCF_004355385.1	64187	Xanthomonas oryzae pv. oryzae	oryzae	Mali	Western Africa	Africa	Oryza sativa	PacBio RSII	4732414	Complete Genome	1
CFBP7331		CFBP7331	GCA_001042815.1	GCF_001042815.1	129394	Xanthomonas oryzae pv. oryzicola	oryzicola	Mali	Western Africa	Africa	Oryza sativa	PacBio RS II	5008292	Complete Genome	1
CFBP7337		CFBP7337	GCA_004355485.1	GCF_004355485.1	64187	Xanthomonas oryzae pv. oryzae	oryzae	Mali	Western Africa	Africa	Oryza sativa	PacBio RSII	4728012	Complete Genome	1
CFBP7340		CFBP7340	GCA_004355365.1	GCF_004355365.1	64187	Xanthomonas oryzae pv. oryzae	oryzae	Niger	Western Africa	Africa	Oryza sativa	PacBio RSII	4743900	Complete Genome	1
CFBP7341		CFBP7341	GCA_001042835.1	GCF_001042835.1	129394	Xanthomonas oryzae pv. oryzicola	oryzicola	Burkina Faso	Western Africa	Africa	Oryza sativa	PacBio RS II	5017766	Complete Genome	1
CFBP7342		CFBP7342	GCA_000940825.1	GCF_000940825.1	129394	Xanthomonas oryzae pv. oryzicola	oryzicola	Burkina Faso	Western Africa	Africa	NA	Pacific Biosciences	5080102	Complete Genome	1
CFBP8172		CFBP8172	GCA_004355345.1	GCF_004355345.1	64187	Xanthomonas oryzae pv. oryzae	oryzae	Benin	Western Africa	Africa	Oryza sativa	PacBio RSII	4658608	Complete Genome	1
CFPB1947		CFPB1947	GCA_001277095.1	GCF_001277095.1	347	Xanthomonas oryzae	NA	Cameroon	Middle Africa	Africa	Oryza sativa	Illumina MiSeq	4534625	Contig	361
CIAT		CIAT	GCA_004355865.1	GCF_004355865.1	64187	Xanthomonas oryzae pv. oryzae	oryzae	Colombia	South America	Americas	Oryza sativa	PacBio	5104724	Complete Genome	2
CIX1041		CIX1041	GCA_004299365.1	GCF_004299365.1	64187	Xanthomonas oryzae pv. oryzae	oryzae	Cote d'Ivoire	Western Africa	Africa	Oryza sativa	PacBio RSII	5012502	Contig	13
CIX2374		CIX2374	GCA_004322815.1	GCF_004322815.1	64187	Xanthomonas oryzae pv. oryzae	oryzae	Senegal	Western Africa	Africa	Oryza sativa	PacBio RSII	4727390	Complete Genome	1
CIX298		CIX298	GCA_004322835.1	GCF_004322835.1	64187	Xanthomonas oryzae pv. oryzae	oryzae	Burkina Faso	Western Africa	Africa	Oryza sativa	PacBio RSII	4745660	Complete Genome	1
CIX44		CIX44	GCA_001277055.1	GCF_001277055.1	347	Xanthomonas oryzae	NA	Madagascar	Eastern Africa	Africa	Oryza sativa	Illumina MiSeq	4693238	Contig	457
CIX611		CIX611	GCA_004299395.1	GCF_004299395.1	64187	Xanthomonas oryzae pv. oryzae	oryzae	Benin	Western Africa	Africa	Oryza longistaminata	PacBio RSII	4677301	Contig	2
CIX629		CIX629	GCA_004321555.1	GCF_004321555.1	64187	Xanthomonas oryzae pv. oryzae	oryzae	Niger	Western Africa	Africa	Oryza sativa	PacBio RSII	4743971	Contig	2
CR1-5		CR1-5	GCA_022409615.1	GCF_022409615.1	64187	Xanthomonas oryzae pv. oryzae	NA	Thailand	Thailand	Asia	NA	PacBio	4911208	Complete Genome	1
Dak16		Dak16	GCA_004355325.1	GCF_004355325.1	64187	Xanthomonas oryzae pv. oryzae	oryzae	Tanzania	Eastern Africa	Africa	Oryza sativa	PacBio RSII	4724326	Complete Genome	1
DBX0011		DBX0011	GCA_003298075.1	GCF_003298075.1	64187	Xanthomonas oryzae pv. oryzae	oryzae	China	China	Asia	rice	Illumina HiSeq	4560916	Scaffold	482
DBX0013		DBX0013	GCA_003298055.1	GCF_003298055.1	64187	Xanthomonas oryzae pv. oryzae	oryzae	China	China	Asia	rice	Illumina HiSeq	4485273	Scaffold	465
DBX0016		DBX0016	GCA_003295585.1	GCF_003295585.1	64187	Xanthomonas oryzae pv. oryzae	oryzae	China	China	Asia	rice	Illumina HiSeq	4568159	Scaffold	471
DBX0017		DBX0017	GCA_003298065.1	GCF_003298065.1	64187	Xanthomonas oryzae pv. oryzae	oryzae	China	China	Asia	rice	Illumina HiSeq	4566249	Scaffold	474
DBX0018		DBX0018	GCA_003297945.1	GCF_003297945.1	64187	Xanthomonas oryzae pv. oryzae	oryzae	China	China	Asia	rice	Illumina HiSeq	4568726	Scaffold	496
DBX0019		DBX0019	GCA_003297915.1	GCF_003297915.1	64187	Xanthomonas oryzae pv. oryzae	oryzae	China	China	Asia	rice	Illumina HiSeq	4504339	Scaffold	452
DBX0020		DBX0020	GCA_003297895.1	GCF_003297895.1	64187	Xanthomonas oryzae pv. oryzae	oryzae	China	China	Asia	rice	Illumina HiSeq	4584733	Scaffold	488
DBX0023		DBX0023	GCA_003297905.1	GCF_003297905.1	64187	Xanthomonas oryzae pv. oryzae	oryzae	China	China	Asia	rice	Illumina HiSeq	4562153	Scaffold	474
DBX0024		DBX0024	GCA_003297785.1	GCF_003297785.1	64187	Xanthomonas oryzae pv. oryzae	oryzae	China	China	Asia	rice	Illumina HiSeq	4568319	Scaffold	474
DBX004		DBX004	GCA_003297775.1	GCF_003297775.1	64187	Xanthomonas oryzae pv. oryzae	oryzae	China	China	Asia	rice	Illumina HiSeq	4586081	Scaffold	481
DXO-012		DXO-012	GCA_001928285.1	GCF_001928285.1	64187	Xanthomonas oryzae pv. oryzae	oryzae	India	India	Asia	Oryza sativa	Illumina MiSeq	4262635	Contig	425
DXO-015		DXO-015	GCA_001927685.1	GCF_001927685.1	64187	Xanthomonas oryzae pv. oryzae	oryzae	India	India	Asia	Oryza sativa	Illumina MiSeq	4275085	Contig	485
DXO-044		DXO-044	GCA_001927695.1	GCF_001927695.1	64187	Xanthomonas oryzae pv. oryzae	oryzae	India	India	Asia	Oryza rufipogon	Illumina MiSeq	4251145	Contig	418
DXO-052		DXO-052	GCA_001928325.1	GCF_001928325.1	64187	Xanthomonas oryzae pv. oryzae	oryzae	India	India	Asia	Oryza sativa	Illumina MiSeq	4237907	Contig	430
DXO-089		DXO-089	GCA_001927765.1	GCF_001927765.1	64187	Xanthomonas oryzae pv. oryzae	oryzae	India	India	Asia	Oryza sativa	Illumina MiSeq	4293254	Contig	450
DXO-091		DXO-091	GCA_001928355.1	GCF_001928355.1	64187	Xanthomonas oryzae pv. oryzae	oryzae	India	India	Asia	Oryza sativa	Illumina MiSeq	4290089	Contig	405
DXO-116		DXO-116	GCA_001928345.1	GCF_001928345.1	64187	Xanthomonas oryzae pv. oryzae	oryzae	India	India	Asia	Oryza sativa	Illumina MiSeq	4255599	Contig	439
DXO-122		DXO-122	GCA_001927775.1	GCF_001927775.1	64187	Xanthomonas oryzae pv. oryzae	oryzae	India	India	Asia	Oryza sativa	Illumina MiSeq	4263052	Contig	410
DXO-129		DXO-129	GCA_001928365.1	GCF_001928365.1	64187	Xanthomonas oryzae pv. oryzae	oryzae	India	India	Asia	Oryza sativa	Illumina MiSeq	4253703	Contig	413
DXO-131		DXO-131	GCA_001927785.1	GCF_001927785.1	64187	Xanthomonas oryzae pv. oryzae	oryzae	India	India	Asia	Oryza sativa	Illumina MiSeq	4245561	Contig	432
DXO-133		DXO-133	GCA_001927795.1	GCF_001927795.1	64187	Xanthomonas oryzae pv. oryzae	oryzae	India	India	Asia	Oryza sativa	Illumina MiSeq	4281787	Contig	420
DXO-150		DXO-150	GCA_001928405.1	GCF_001928405.1	64187	Xanthomonas oryzae pv. oryzae	oryzae	India	India	Asia	Oryza sativa	Illumina MiSeq	4236170	Contig	432
DXO-165		DXO-165	GCA_001927845.1	GCF_001927845.1	64187	Xanthomonas oryzae pv. oryzae	oryzae	India	India	Asia	Oryza sativa	Illumina MiSeq	4303832	Contig	425
DXO-170		DXO-170	GCA_001928415.1	GCF_001928415.1	64187	Xanthomonas oryzae pv. oryzae	oryzae	India	India	Asia	Oryza sativa	Illumina MiSeq	4327845	Contig	408
DXO-174		DXO-174	GCA_001927855.1	GCF_001927855.1	64187	Xanthomonas oryzae pv. oryzae	oryzae	India	India	Asia	Oryza sativa	Illumina MiSeq	4297733	Contig	448
DXO-181		DXO-181	GCA_001928425.1	GCF_001928425.1	64187	Xanthomonas oryzae pv. oryzae	oryzae	India	India	Asia	Oryza sativa	Illumina MiSeq	4275923	Contig	436
DXO-200		DXO-200	GCA_001928445.1	GCF_001928445.1	64187	Xanthomonas oryzae pv. oryzae	oryzae	India	India	Asia	Oryza sativa	Illumina MiSeq	4248181	Contig	459
DXO-203		DXO-203	GCA_001927865.1	GCF_001927865.1	64187	Xanthomonas oryzae pv. oryzae	oryzae	India	India	Asia	Oryza sativa	Illumina MiSeq	4257908	Contig	392
DXO-206		DXO-206	GCA_001928485.1	GCF_001928485.1	64187	Xanthomonas oryzae pv. oryzae	oryzae	India	India	Asia	Oryza sativa	Illumina MiSeq	4378119	Contig	431
DXO-216		DXO-216	GCA_001927875.1	GCF_001927875.1	64187	Xanthomonas oryzae pv. oryzae	oryzae	India	India	Asia	Oryza sativa	Illumina MiSeq	4267255	Contig	412
DXO-226		DXO-226	GCA_001928495.1	GCF_001928495.1	64187	Xanthomonas oryzae pv. oryzae	oryzae	India	India	Asia	Oryza sativa	Illumina MiSeq	4274792	Contig	443
DXO-233		DXO-233	GCA_001928525.1	GCF_001928525.1	64187	Xanthomonas oryzae pv. oryzae	oryzae	India	India	Asia	Oryza sativa	Illumina MiSeq	4380803	Contig	472
DXO-242		DXO-242	GCA_001927925.1	GCF_001927925.1	64187	Xanthomonas oryzae pv. oryzae	oryzae	India	India	Asia	Oryza sativa	Illumina MiSeq	4275959	Contig	478
DXO-246		DXO-246	GCA_001927945.1	GCF_001927945.1	64187	Xanthomonas oryzae pv. oryzae	oryzae	India	India	Asia	Oryza sativa	Illumina MiSeq	4284167	Contig	467
DXO-248		DXO-248	GCA_001928515.1	GCF_001928515.1	64187	Xanthomonas oryzae pv. oryzae	oryzae	India	India	Asia	Oryza sativa	Illumina MiSeq	4227929	Contig	419
DXO-27		DXO-27	GCA_001927705.1	GCF_001927705.1	64187	Xanthomonas oryzae pv. oryzae	oryzae	India	India	Asia	Oryza sativa	Illumina MiSeq	4224303	Contig	432
DXO-331		DXO-331	GCA_001927935.1	GCF_001927935.1	64187	Xanthomonas oryzae pv. oryzae	oryzae	India	India	Asia	Oryza sativa	Illumina MiSeq	4319470	Contig	430
DXO-369		DXO-369	GCA_001928565.1	GCF_001928565.1	64187	Xanthomonas oryzae pv. oryzae	oryzae	India	India	Asia	Oryza sativa	Illumina MiSeq	4262290	Contig	405
DXO-397		DXO-397	GCA_001927955.1	GCF_001927955.1	64187	Xanthomonas oryzae pv. oryzae	oryzae	India	India	Asia	Oryza sativa	Illumina MiSeq	4262586	Contig	424
DXO-50		DXO-50	GCA_001927725.1	GCF_001927725.1	64187	Xanthomonas oryzae pv. oryzae	oryzae	India	India	Asia	Oryza sativa	Illumina MiSeq	4354589	Contig	414
DY89031(J18)		DY89031(J18)	GCA_018288775.1	GCF_018288775.1	64187	Xanthomonas oryzae pv. oryzae	oryzae	South Korea	South Korea	Asia	Rice	PacBio RSII	4979456	Complete Genome	1
FJ16		FJ16	GCA_003297765.1	GCF_003297765.1	64187	Xanthomonas oryzae pv. oryzae	oryzae	China	China	Asia	rice	Illumina HiSeq	4625287	Scaffold	554
FJ17		FJ17	GCA_003297745.1	GCF_003297745.1	64187	Xanthomonas oryzae pv. oryzae	oryzae	China	China	Asia	rice	Illumina HiSeq	4587718	Scaffold	444
FJ21		FJ21	GCA_003297685.1	GCF_003297685.1	64187	Xanthomonas oryzae pv. oryzae	oryzae	China	China	Asia	rice	Illumina HiSeq	4635498	Scaffold	426
FJ22		FJ22	GCA_003295525.1	GCF_003295525.1	64187	Xanthomonas oryzae pv. oryzae	oryzae	China	China	Asia	rice	Illumina HiSeq	4580689	Scaffold	429
FJ24		FJ24	GCA_003297625.1	GCF_003297625.1	64187	Xanthomonas oryzae pv. oryzae	oryzae	China	China	Asia	rice	Illumina HiSeq	4630492	Scaffold	431
FuJ		FuJ	GCA_002895665.1	GCF_002895665.1	64187	Xanthomonas oryzae pv. oryzae	oryzae	China	China	Asia	rice	Illumina HiSeq	4296252	Contig	513
GD33		GD33	GCA_003297505.1	GCF_003297505.1	64187	Xanthomonas oryzae pv. oryzae	oryzae	China	China	Asia	rice	Illumina HiSeq	4588605	Scaffold	442
GD401		GD401	GCA_003295565.1	GCF_003295565.1	64187	Xanthomonas oryzae pv. oryzae	oryzae	China	China	Asia	rice	Illumina HiSeq	4553045	Scaffold	464
GD402		GD402	GCA_003295545.1	GCF_003295545.1	64187	Xanthomonas oryzae pv. oryzae	oryzae	China	China	Asia	rice	Illumina HiSeq	4586404	Scaffold	435
GD403		GD403	GCA_003295515.1	GCF_003295515.1	64187	Xanthomonas oryzae pv. oryzae	oryzae	China	China	Asia	rice	Illumina HiSeq	4589885	Scaffold	438
GD404		GD404	GCA_003297395.1	GCF_003297395.1	64187	Xanthomonas oryzae pv. oryzae	oryzae	China	China	Asia	rice	Illumina HiSeq	4595334	Scaffold	473
GD405		GD405	GCA_003297375.1	GCF_003297375.1	64187	Xanthomonas oryzae pv. oryzae	oryzae	China	China	Asia	rice	Illumina HiSeq	4645341	Scaffold	436
GD407		GD407	GCA_003295485.1	GCF_003295485.1	64187	Xanthomonas oryzae pv. oryzae	oryzae	China	China	Asia	rice	Illumina HiSeq	4525391	Scaffold	468
GD408		GD408	GCA_003297285.1	GCF_003297285.1	64187	Xanthomonas oryzae pv. oryzae	oryzae	China	China	Asia	rice	Illumina HiSeq	4610420	Scaffold	444
GD411		GD411	GCA_003297275.1	GCF_003297275.1	64187	Xanthomonas oryzae pv. oryzae	oryzae	China	China	Asia	rice	Illumina HiSeq	4581070	Scaffold	444
GD413		GD413	GCA_003295455.1	GCF_003295455.1	64187	Xanthomonas oryzae pv. oryzae	oryzae	China	China	Asia	rice	Illumina HiSeq	4524974	Scaffold	446
GD417		GD417	GCA_003297235.1	GCF_003297235.1	64187	Xanthomonas oryzae pv. oryzae	oryzae	China	China	Asia	rice	Illumina HiSeq	4511658	Scaffold	467
GX01		GX01	GCA_020084945.1	GCF_020084945.1	129394	Xanthomonas oryzae pv. oryzicola	oryzicola	China	China	Asia	Oryza sativa	PacBio RSII	4865182	Complete Genome	2
GX1		GX1	GCA_003297195.1	GCF_003297195.1	64187	Xanthomonas oryzae pv. oryzae	oryzae	China	China	Asia	rice	Illumina HiSeq	4569831	Scaffold	470
GX2		GX2	GCA_003295375.1	GCF_003295375.1	64187	Xanthomonas oryzae pv. oryzae	oryzae	China	China	Asia	rice	Illumina HiSeq	4543656	Scaffold	472
GX3		GX3	GCA_003295365.1	GCF_003295365.1	64187	Xanthomonas oryzae pv. oryzae	oryzae	China	China	Asia	rice	Illumina HiSeq	4554803	Scaffold	472
GX4		GX4	GCA_003297145.1	GCF_003297145.1	64187	Xanthomonas oryzae pv. oryzae	oryzae	China	China	Asia	rice	Illumina HiSeq	4540675	Scaffold	471
GX5		GX5	GCA_003297095.1	GCF_003297095.1	64187	Xanthomonas oryzae pv. oryzae	oryzae	China	China	Asia	rice	Illumina HiSeq	4542508	Scaffold	482
GX56		GX56	GCA_003297085.1	GCF_003297085.1	64187	Xanthomonas oryzae pv. oryzae	oryzae	China	China	Asia	rice	Illumina HiSeq	4454091	Scaffold	535
GX6		GX6	GCA_003295335.1	GCF_003295335.1	64187	Xanthomonas oryzae pv. oryzae	oryzae	China	China	Asia	rice	Illumina HiSeq	4462606	Scaffold	456
GXO2001		GXO2001	GCA_020866785.1	GCF_020866785.1	64187	Xanthomonas oryzae pv. oryzae	oryzae	China	China	Asia	Oryza sativa	PacBio Sequel	4963479	Complete Genome	1
GXO2006		GXO2006	GCA_020790135.1	GCF_020790135.1	64187	Xanthomonas oryzae pv. oryzae	oryzae	China	China	Asia	Oryza sativa	PacBio Sequel	4966657	Complete Genome	1
GXO2016		GXO2016	GCA_021228635.1	GCF_021228635.1	64187	Xanthomonas oryzae pv. oryzae	oryzae	China	China	Asia	Oryza sativa	PacBio Sequel	4929712	Complete Genome	1
HaN1		HaN1	GCA_003297035.1	GCF_003297035.1	64187	Xanthomonas oryzae pv. oryzae	oryzae	China	China	Asia	rice	Illumina HiSeq	4516720	Scaffold	480
HeN03-01		HeN03-01	GCA_003296915.1	GCF_003296915.1	64187	Xanthomonas oryzae pv. oryzae	oryzae	China	China	Asia	rice	Illumina HiSeq	4613762	Scaffold	433
HeN03-03		HeN03-03	GCA_003296935.1	GCF_003296935.1	64187	Xanthomonas oryzae pv. oryzae	oryzae	China	China	Asia	rice	Illumina HiSeq	4606342	Scaffold	426
HeN03-04		HeN03-04	GCA_003296925.1	GCF_003296925.1	64187	Xanthomonas oryzae pv. oryzae	oryzae	China	China	Asia	rice	Illumina HiSeq	4573472	Scaffold	431
HeN03-06		HeN03-06	GCA_003295315.1	GCF_003295315.1	64187	Xanthomonas oryzae pv. oryzae	oryzae	China	China	Asia	rice	Illumina HiSeq	4592180	Scaffold	430
HeN03-10		HeN03-10	GCA_003295275.1	GCF_003295275.1	64187	Xanthomonas oryzae pv. oryzae	oryzae	China	China	Asia	rice	Illumina HiSeq	4599419	Scaffold	418
HEN11		HEN11	GCA_003296805.1	GCF_003296805.1	64187	Xanthomonas oryzae pv. oryzae	oryzae	China	China	Asia	rice	Illumina HiSeq	4603315	Scaffold	437
HGA4		HGA4	GCA_021729945.1	GCF_021729945.1	129394	Xanthomonas oryzae pv. oryzicola	oryzicola	China	China	Asia	NA	Oxford Nanopore GridION	4794788	Complete Genome	1
HLJ-85-72		HLJ-85-72	GCA_003296765.1	GCF_003296765.1	64187	Xanthomonas oryzae pv. oryzae	oryzae	China	China	Asia	rice	Illumina HiSeq	4538966	Scaffold	443
HLJ02		HLJ02	GCA_003295245.1	GCF_003295245.1	64187	Xanthomonas oryzae pv. oryzae	oryzae	China	China	Asia	rice	Illumina HiSeq	4479496	Scaffold	487
HUB14		HUB14	GCA_003296695.1	GCF_003296695.1	64187	Xanthomonas oryzae pv. oryzae	oryzae	China	China	Asia	rice	Illumina HiSeq	4569453	Scaffold	458
HUN20		HUN20	GCA_003295185.1	GCF_003295185.1	64187	Xanthomonas oryzae pv. oryzae	oryzae	China	China	Asia	rice	Illumina HiSeq	4551866	Scaffold	511
HUN22		HUN22	GCA_003295175.1	GCF_003295175.1	64187	Xanthomonas oryzae pv. oryzae	oryzae	China	China	Asia	rice	Illumina HiSeq	4542112	Scaffold	484
HuN37		HuN37	GCA_003382775.1	GCF_003382775.1	64187	Xanthomonas oryzae pv. oryzae	oryzae	China	China	Asia	rice	PacBio	4915452	Complete Genome	1
ICMP3125		ICMP3125	GCA_004136375.1	GCF_004136375.1	64187	Xanthomonas oryzae pv. oryzae	oryzae	India	India	Asia	Oryza sativa	PacBio RSII	4990672	Complete Genome	1
IX-280		IX-280	GCA_003427055.1	GCF_003427055.1	64187	Xanthomonas oryzae pv. oryzae	oryzae	India	India	Asia	Oryza sativa	PacBio	5006569	Complete Genome	2
IXO1088		IXO1088	GCA_001929235.2	GCF_001929235.2	64187	Xanthomonas oryzae pv. oryzae	oryzae	India	India	Asia	Oryza sativa	Illumina MiSeq; Oxford Nanopore MiniION	5093052	Complete Genome	1
IXO1104		IXO1104	GCA_001929245.1	GCF_001929245.1	64187	Xanthomonas oryzae pv. oryzae	oryzae	India	India	Asia	Oryza sativa	Illumina MiSeq	4394189	Contig	474
IXO1221		IXO1221	GCA_001929255.1	GCF_001929255.1	64187	Xanthomonas oryzae pv. oryzae	oryzae	India	India	Asia	Oryza sativa	Illumina MiSeq	4343020	Contig	490
IXO134		IXO134	GCA_001928095.1	GCF_001928095.1	64187	Xanthomonas oryzae pv. oryzae	oryzae	India	India	Asia	Oryza sativa	Illumina MiSeq	4396215	Contig	438
IXO141		IXO141	GCA_001928675.1	GCF_001928675.1	64187	Xanthomonas oryzae pv. oryzae	oryzae	India	India	Asia	Oryza sativa	Illumina MiSeq	4346133	Contig	432
IXO151		IXO151	GCA_001928105.1	GCF_001928105.1	64187	Xanthomonas oryzae pv. oryzae	oryzae	India	India	Asia	Oryza sativa	Illumina MiSeq	4363181	Contig	474
IXO159		IXO159	GCA_001928135.1	GCF_001928135.1	64187	Xanthomonas oryzae pv. oryzae	oryzae	India	India	Asia	Oryza sativa	Illumina MiSeq	4282422	Contig	426
IXO189		IXO189	GCA_001928665.1	GCF_001928665.1	64187	Xanthomonas oryzae pv. oryzae	oryzae	India	India	Asia	Oryza sativa	Illumina MiSeq	4280634	Contig	410
IXO220		IXO220	GCA_001928165.1	GCF_001928165.1	64187	Xanthomonas oryzae pv. oryzae	oryzae	India	India	Asia	Oryza sativa	Illumina MiSeq	4298957	Contig	450
IXO221		IXO221	GCA_001928175.1	GCF_001928175.1	64187	Xanthomonas oryzae pv. oryzae	oryzae	India	India	Asia	Oryza sativa	Illumina MiSeq	4252034	Contig	433
IXO222		IXO222	GCA_001928685.1	GCF_001928685.1	64187	Xanthomonas oryzae pv. oryzae	oryzae	India	India	Asia	Oryza sativa	Illumina MiSeq	4368722	Contig	456
IXO278		IXO278	GCA_001928185.1	GCF_001928185.1	64187	Xanthomonas oryzae pv. oryzae	oryzae	India	India	Asia	Oryza sativa	Illumina MiSeq	4309904	Contig	447
IXO35		IXO35	GCA_001928585.1	GCF_001928585.1	64187	Xanthomonas oryzae pv. oryzae	oryzae	India	India	Asia	Oryza sativa	Illumina MiSeq	4337262	Contig	408
IXO365		IXO365	GCA_001928695.1	GCF_001928695.1	64187	Xanthomonas oryzae pv. oryzae	oryzae	India	India	Asia	Oryza sativa	Illumina MiSeq	4390245	Contig	477
IXO367		IXO367	GCA_001928745.1	GCF_001928745.1	64187	Xanthomonas oryzae pv. oryzae	oryzae	India	India	Asia	Oryza sativa	Illumina MiSeq	4254067	Contig	420
IXO390		IXO390	GCA_001928765.1	GCF_001928765.1	64187	Xanthomonas oryzae pv. oryzae	oryzae	India	India	Asia	Oryza sativa	Illumina MiSeq	4357480	Contig	440
IXO411		IXO411	GCA_001928755.1	GCF_001928755.1	64187	Xanthomonas oryzae pv. oryzae	oryzae	India	India	Asia	Oryza sativa	Illumina MiSeq	4303171	Contig	439
IXO414		IXO414	GCA_001928775.1	GCF_001928775.1	64187	Xanthomonas oryzae pv. oryzae	oryzae	India	India	Asia	Oryza sativa	Illumina MiSeq	4241906	Contig	420
IXO493		IXO493	GCA_001928825.1	GCF_001928825.1	64187	Xanthomonas oryzae pv. oryzae	oryzae	India	India	Asia	Oryza sativa	Illumina MiSeq	4381386	Contig	466
IXO597		IXO597	GCA_001928835.1	GCF_001928835.1	64187	Xanthomonas oryzae pv. oryzae	oryzae	India	India	Asia	Oryza sativa	Illumina MiSeq	4280137	Contig	445
IXO599		IXO599	GCA_001928855.1	GCF_001928855.1	64187	Xanthomonas oryzae pv. oryzae	oryzae	India	India	Asia	Oryza sativa	Illumina MiSeq	4306356	Contig	433
IXO603		IXO603	GCA_001928845.1	GCF_001928845.1	64187	Xanthomonas oryzae pv. oryzae	oryzae	India	India	Asia	Oryza sativa	Illumina MiSeq	4279040	Contig	444
IXO608		IXO608	GCA_001928905.1	GCF_001928905.1	64187	Xanthomonas oryzae pv. oryzae	oryzae	India	India	Asia	Oryza sativa	Illumina MiSeq	4276378	Contig	423
IXO620		IXO620	GCA_001928915.1	GCF_001928915.1	64187	Xanthomonas oryzae pv. oryzae	oryzae	India	India	Asia	Oryza sativa	Illumina MiSeq	4358519	Contig	409
IXO621		IXO621	GCA_001928935.1	GCF_001928935.1	64187	Xanthomonas oryzae pv. oryzae	oryzae	India	India	Asia	Oryza sativa	Illumina MiSeq	4343614	Contig	430
IXO627		IXO627	GCA_001928945.1	GCF_001928945.1	64187	Xanthomonas oryzae pv. oryzae	oryzae	India	India	Asia	Oryza sativa	Illumina MiSeq	4332145	Contig	496
IXO630		IXO630	GCA_001928985.1	GCF_001928985.1	64187	Xanthomonas oryzae pv. oryzae	oryzae	India	India	Asia	Oryza sativa	Illumina MiSeq	4407718	Contig	481
IXO639		IXO639	GCA_001928995.1	GCF_001928995.1	64187	Xanthomonas oryzae pv. oryzae	oryzae	India	India	Asia	Oryza sativa	Illumina MiSeq	4275115	Contig	404
IXO644		IXO644	GCA_001929015.1	GCF_001929015.1	64187	Xanthomonas oryzae pv. oryzae	oryzae	India	India	Asia	Oryza sativa	Illumina MiSeq	4376609	Contig	431
IXO645		IXO645	GCA_001929005.1	GCF_001929005.1	64187	Xanthomonas oryzae pv. oryzae	oryzae	India	India	Asia	Oryza sativa	Illumina MiSeq	4406486	Contig	490
IXO651		IXO651	GCA_001929065.1	GCF_001929065.1	64187	Xanthomonas oryzae pv. oryzae	oryzae	India	India	Asia	Oryza sativa	Illumina MiSeq	4343745	Contig	457
IXO675		IXO675	GCA_001929075.1	GCF_001929075.1	64187	Xanthomonas oryzae pv. oryzae	oryzae	India	India	Asia	Oryza sativa	Illumina MiSeq	4296138	Contig	433
IXO685		IXO685	GCA_001929085.1	GCF_001929085.1	64187	Xanthomonas oryzae pv. oryzae	oryzae	India	India	Asia	Oryza sativa	Illumina MiSeq	4371551	Contig	474
IXO704		IXO704	GCA_001929095.2	GCF_001929095.2	64187	Xanthomonas oryzae pv. oryzae	oryzae	India	India	Asia	Oryza sativa	Oxford Nanopore MiniION; Illumina MiSeq	5020011	Complete Genome	2
IXO725		IXO725	GCA_001929145.1	GCF_001929145.1	64187	Xanthomonas oryzae pv. oryzae	oryzae	India	India	Asia	Oryza sativa	Illumina MiSeq	4378586	Contig	453
IXO74		IXO74	GCA_001928005.1	GCF_001928005.1	64187	Xanthomonas oryzae pv. oryzae	oryzae	India	India	Asia	Oryza sativa	Illumina MiSeq	4313996	Contig	424
IXO792		IXO792	GCA_001929155.1	GCF_001929155.1	64187	Xanthomonas oryzae pv. oryzae	oryzae	India	India	Asia	Oryza sativa	Illumina MiSeq	4369359	Contig	448
IXO812		IXO812	GCA_001929185.1	GCF_001929185.1	64187	Xanthomonas oryzae pv. oryzae	oryzae	India	India	Asia	Oryza sativa	Illumina MiSeq	4325706	Contig	474
IXO842		IXO842	GCA_001929165.1	GCF_001929165.1	64187	Xanthomonas oryzae pv. oryzae	oryzae	India	India	Asia	Oryza sativa	Illumina MiSeq	4349105	Contig	466
IXO884		IXO884	GCA_001929225.1	GCF_001929225.1	64187	Xanthomonas oryzae pv. oryzae	oryzae	India	India	Asia	Oryza sativa	Illumina MiSeq	4324742	Contig	450
IXO89		IXO89	GCA_001928015.1	GCF_001928015.1	64187	Xanthomonas oryzae pv. oryzae	oryzae	India	India	Asia	Oryza sativa	Illumina MiSeq	4297141	Contig	448
IXO90		IXO90	GCA_001928605.1	GCF_001928605.1	64187	Xanthomonas oryzae pv. oryzae	oryzae	India	India	Asia	Oryza sativa	Illumina MiSeq	4296770	Contig	477
IXO92		IXO92	GCA_001928615.1	GCF_001928615.1	64187	Xanthomonas oryzae pv. oryzae	oryzae	India	India	Asia	Oryza sativa	Illumina MiSeq	4310692	Contig	419
IXO93		IXO93	GCA_001928025.1	GCF_001928025.1	64187	Xanthomonas oryzae pv. oryzae	oryzae	India	India	Asia	Oryza sativa	Illumina MiSeq	4271733	Contig	418
IXO97		IXO97	GCA_001928625.1	GCF_001928625.1	64187	Xanthomonas oryzae pv. oryzae	oryzae	India	India	Asia	Oryza sativa	Illumina MiSeq	4327059	Contig	430
IXO98		IXO98	GCA_001928035.1	GCF_001928035.1	64187	Xanthomonas oryzae pv. oryzae	oryzae	India	India	Asia	Oryza sativa	Illumina MiSeq	4256182	Contig	416
IXO99		IXO99	GCA_001928085.1	GCF_001928085.1	64187	Xanthomonas oryzae pv. oryzae	oryzae	India	India	Asia	Oryza sativa	Illumina MiSeq	4275441	Contig	405
JL1		JL1	GCA_003296565.1	GCF_003296565.1	64187	Xanthomonas oryzae pv. oryzae	oryzae	China	China	Asia	rice	Illumina HiSeq	4562821	Scaffold	487
JL1-2003		JL1-2003	GCA_003296505.1	GCF_003296505.1	64187	Xanthomonas oryzae pv. oryzae	oryzae	China	China	Asia	rice	Illumina HiSeq	4540843	Scaffold	424
JL11		JL11	GCA_003296515.1	GCF_003296515.1	64187	Xanthomonas oryzae pv. oryzae	oryzae	China	China	Asia	rice	Illumina HiSeq	4569541	Scaffold	445
JL12		JL12	GCA_003296465.1	GCF_003296465.1	64187	Xanthomonas oryzae pv. oryzae	oryzae	China	China	Asia	rice	Illumina HiSeq	4493203	Scaffold	488
JL13		JL13	GCA_003296495.1	GCF_003296495.1	64187	Xanthomonas oryzae pv. oryzae	oryzae	China	China	Asia	rice	Illumina HiSeq	4569939	Scaffold	444
JL15		JL15	GCA_003295125.1	GCF_003295125.1	64187	Xanthomonas oryzae pv. oryzae	oryzae	China	China	Asia	rice	Illumina HiSeq	4588777	Scaffold	480
JL17		JL17	GCA_003296415.1	GCF_003296415.1	64187	Xanthomonas oryzae pv. oryzae	oryzae	China	China	Asia	rice	Illumina HiSeq	4569909	Scaffold	482
JL19		JL19	GCA_003295075.1	GCF_003295075.1	64187	Xanthomonas oryzae pv. oryzae	oryzae	China	China	Asia	rice	Illumina HiSeq	4549441	Scaffold	438
JL21		JL21	GCA_003296255.1	GCF_003296255.1	64187	Xanthomonas oryzae pv. oryzae	oryzae	China	China	Asia	rice	Illumina HiSeq	4489602	Scaffold	471
JL22		JL22	GCA_003296405.1	GCF_003296405.1	64187	Xanthomonas oryzae pv. oryzae	oryzae	China	China	Asia	rice	Illumina HiSeq	4497011	Scaffold	473
JL23		JL23	GCA_003295065.1	GCF_003295065.1	64187	Xanthomonas oryzae pv. oryzae	oryzae	China	China	Asia	rice	Illumina HiSeq	4531137	Scaffold	431
JL25		JL25	GCA_003382795.1	GCF_003382795.1	64187	Xanthomonas oryzae pv. oryzae	oryzae	China	China	Asia	rice	PacBio	4900521	Complete Genome	1
JL28		JL28	GCA_003382815.1	GCF_003382815.1	64187	Xanthomonas oryzae pv. oryzae	oryzae	China	China	Asia	rice	PacBio	4697691	Complete Genome	1
JL3		JL3	GCA_003296305.1	GCF_003296305.1	64187	Xanthomonas oryzae pv. oryzae	oryzae	China	China	Asia	rice	Illumina HiSeq	4656614	Scaffold	462
JL33		JL33	GCA_003382835.1	GCF_003382835.1	64187	Xanthomonas oryzae pv. oryzae	oryzae	China	China	Asia	rice	PacBio	4898917	Complete Genome	1
JL4		JL4	GCA_003296245.1	GCF_003296245.1	64187	Xanthomonas oryzae pv. oryzae	oryzae	China	China	Asia	rice	Illumina HiSeq	4567963	Scaffold	490
JL6		JL6	GCA_003295045.1	GCF_003295045.1	64187	Xanthomonas oryzae pv. oryzae	oryzae	China	China	Asia	rice	Illumina HiSeq	4564931	Scaffold	440
JP01		JP01	GCA_003382855.1	GCF_003382855.1	64187	Xanthomonas oryzae pv. oryzae	oryzae	Japan	Japan	Asia	rice	PacBio	4948537	Complete Genome	1
JP02		JP02	GCA_003294995.1	GCF_003294995.1	64187	Xanthomonas oryzae pv. oryzae	oryzae	Japan	Japan	Asia	rice	Illumina HiSeq	4594987	Scaffold	429
JP03		JP03	GCA_003296115.1	GCF_003296115.1	64187	Xanthomonas oryzae pv. oryzae	oryzae	Japan	Japan	Asia	rice	Illumina HiSeq	4603380	Scaffold	427
JP04		JP04	GCA_003296105.1	GCF_003296105.1	64187	Xanthomonas oryzae pv. oryzae	oryzae	Japan	Japan	Asia	rice	Illumina HiSeq	4678981	Scaffold	459
JS65		JS65	GCA_003296065.1	GCF_003296065.1	64187	Xanthomonas oryzae pv. oryzae	oryzae	China	China	Asia	rice	Illumina HiSeq	4534328	Scaffold	495
JW11089		JW11089	GCA_004355765.2	GCF_004355765.2	64187	Xanthomonas oryzae pv. oryzae	oryzae	South Korea	South Korea	Asia	Oryza sativa	PacBio	5010511	Complete Genome	1
JX19		JX19	GCA_003294955.1	GCF_003294955.1	64187	Xanthomonas oryzae pv. oryzae	oryzae	China	China	Asia	rice	Illumina HiSeq	4578289	Scaffold	435
JX21		JX21	GCA_003296015.1	GCF_003296015.1	64187	Xanthomonas oryzae pv. oryzae	oryzae	China	China	Asia	rice	Illumina HiSeq	4509047	Scaffold	460
K1		K1	GCA_011045315.1	GCF_011045315.1	64187	Xanthomonas oryzae pv. oryzae	oryzae	South Korea	South Korea	Asia	Oryzae sativa L.	Illumina	4981423	Complete Genome	1
K2		K2	GCA_011604745.1	GCF_011604745.1	64187	Xanthomonas oryzae pv. oryzae	oryzae	South Korea	South Korea	Asia	Oryzae sativa L.	Illumina	4984295	Complete Genome	1
K3		K3	GCA_011604765.1	GCF_011604765.1	64187	Xanthomonas oryzae pv. oryzae	oryzae	South Korea	South Korea	Asia	Oryzae sativa L.	Illumina	4945802	Complete Genome	1
K3a		K3a	GCA_011604785.1	GCF_011604785.1	64187	Xanthomonas oryzae pv. oryzae	oryzae	South Korea	South Korea	Asia	Orizae sativa L.	Illumina	4880106	Complete Genome	1
KXO85		KXO85	GCA_004355845.1	GCF_004355845.1	64187	Xanthomonas oryzae pv. oryzae	oryzae	South Korea	South Korea	Asia	Oryza sativa	PacBio	4975259	Complete Genome	1
L8		L8	GCA_001042855.1	GCF_001042855.1	129394	Xanthomonas oryzae pv. oryzicola	oryzicola	China	China	Asia	Oryza sativa	PacBio RS II	4796527	Complete Genome	1
LN-85-59		LN-85-59	GCA_003294835.1	GCF_003294835.1	64187	Xanthomonas oryzae pv. oryzae	oryzae	China	China	Asia	rice	Illumina HiSeq	4592680	Scaffold	435
LN01		LN01	GCA_003295965.1	GCF_003295965.1	64187	Xanthomonas oryzae pv. oryzae	oryzae	China	China	Asia	rice	Illumina HiSeq	4508811	Scaffold	474
LN02		LN02	GCA_003295955.1	GCF_003295955.1	64187	Xanthomonas oryzae pv. oryzae	oryzae	China	China	Asia	rice	Illumina HiSeq	4553921	Scaffold	454
LN1		LN1	GCA_003295925.1	GCF_003295925.1	64187	Xanthomonas oryzae pv. oryzae	oryzae	China	China	Asia	rice	Illumina HiSeq	4554424	Scaffold	468
LN2		LN2	GCA_003294875.1	GCF_003294875.1	64187	Xanthomonas oryzae pv. oryzae	oryzae	China	China	Asia	rice	Illumina HiSeq	4573068	Scaffold	501
LN3		LN3	GCA_003295915.1	GCF_003295915.1	64187	Xanthomonas oryzae pv. oryzae	oryzae	China	China	Asia	rice	Illumina HiSeq	4561011	Scaffold	485
LYG46		LYG46	GCA_003295805.1	GCF_003295805.1	64187	Xanthomonas oryzae pv. oryzae	oryzae	China	China	Asia	rice	Illumina HiSeq	4533357	Scaffold	470
LYG48		LYG48	GCA_003295795.1	GCF_003295795.1	64187	Xanthomonas oryzae pv. oryzae	oryzae	China	China	Asia	rice	Illumina HiSeq	4508455	Scaffold	486
LYG51		LYG51	GCA_003295775.1	GCF_003295775.1	64187	Xanthomonas oryzae pv. oryzae	oryzae	China	China	Asia	rice	Illumina HiSeq	4530076	Scaffold	478
LYG52		LYG52	GCA_003294715.1	GCF_003294715.1	64187	Xanthomonas oryzae pv. oryzae	oryzae	China	China	Asia	rice	Illumina HiSeq	4536047	Scaffold	499
LYG53		LYG53	GCA_003300845.1	GCF_003300845.1	64187	Xanthomonas oryzae pv. oryzae	oryzae	China	China	Asia	rice	Illumina HiSeq	4532695	Scaffold	465
MAFF311018		MAFF 311018	GCA_000010025.1	GCF_000010025.1	342109	Xanthomonas oryzae pv. oryzae MAFF 311018	oryzae	Japan	Japan	Asia	NA	NA	4940217	Complete Genome	1
MAI1		MAI1	GCA_003031365.1	GCF_003031365.1	64187	Xanthomonas oryzae pv. oryzae	oryzae	Mali	Western Africa	Africa	Oryza sativa	PacBio	4735208	Complete Genome	1
MAI106		MAI106	GCA_002850135.1	GCF_002850135.1	64187	Xanthomonas oryzae pv. oryzae	oryzae	Mali	Western Africa	Africa	Oryza sativa	PacBio	4705454	Complete Genome	1
MAI129		MAI129	GCA_002850155.1	GCF_002850155.1	64187	Xanthomonas oryzae pv. oryzae	oryzae	Mali	Western Africa	Africa	Oryza sativa	PacBio	4703963	Complete Genome	1
MAI134		MAI134	GCA_002850175.1	GCF_002850175.1	64187	Xanthomonas oryzae pv. oryzae	oryzae	Mali	Western Africa	Africa	Oryza longistaminata	PacBio	4730142	Complete Genome	1
MAI145		MAI145	GCA_002850095.1	GCF_002850095.1	64187	Xanthomonas oryzae pv. oryzae	oryzae	Mali	Western Africa	Africa	Oryza sativa	PacBio	4703977	Complete Genome	1
MAI68		MAI68	GCA_002850115.1	GCF_002850115.1	64187	Xanthomonas oryzae pv. oryzae	oryzae	Mali	Western Africa	Africa	Oryza sativa	PacBio	4703782	Complete Genome	1
MAI73		MAI73	GCA_002850075.1	GCF_002850075.1	64187	Xanthomonas oryzae pv. oryzae	oryzae	Mali	Western Africa	Africa	Oryza sativa	PacBio	4703982	Complete Genome	1
MAI95		MAI95	GCA_002850195.1	GCF_002850195.1	64187	Xanthomonas oryzae pv. oryzae	oryzae	Mali	Western Africa	Africa	Oryza sativa	PacBio	4705038	Complete Genome	1
MAI99		MAI99	GCA_002850215.1	GCF_002850215.1	64187	Xanthomonas oryzae pv. oryzae	oryzae	Mali	Western Africa	Africa	Oryza sativa	PacBio	4698819	Complete Genome	1
NAI8		NAI8	GCA_000511585.1	GCF_000511585.1	1423889	Xanthomonas oryzae pv. oryzae NAI8	pv. oryzae	Niger	Western Africa	Africa	Oryza sativa	Illumina GAIIx	4344053	Contig	515
NCPPB4346		NCPPB 4346	GCA_001276975.2	GCF_001276975.2	347	Xanthomonas oryzae	NA	China	China	Asia	Leersia hexandra	PacBio Sequel	4949574	Complete Genome	1
NJ01		NJ01	GCA_022559705.1	GCF_022559705.1	347	Xanthomonas oryzae	NA	China	China	Asia	NA	Oxford Nanopore PromethION	4966135	Complete Genome	1
NJ611		NJ611	GCA_004319445.1	GCF_004319445.1	347	Xanthomonas oryzae	NA	Mali	Western Africa	Africa	Leersia hexandra	PacBio Sequel	4907789	Complete Genome	1
NX0260		NX0260	GCA_004355825.1	GCF_004355825.1	64187	Xanthomonas oryzae pv. oryzae	oryzae	Nepal	Nepal	Asia	Oryza sativa	PacBio	5050391	Complete Genome	1
OS221		OS221	GCA_003300585.1	GCF_003300585.1	64187	Xanthomonas oryzae pv. oryzae	oryzae	China	China	Asia	rice	Illumina HiSeq	4541500	Scaffold	397
OS225		OS225	GCA_003300515.1	GCF_003300515.1	64187	Xanthomonas oryzae pv. oryzae	oryzae	China	China	Asia	rice	Illumina HiSeq	4502822	Scaffold	413
PX079		PX079	GCA_003382895.1	GCF_003382895.1	64187	Xanthomonas oryzae pv. oryzae	oryzae	Philippines	Philippines	Asia	rice	PacBio	5026592	Complete Genome	1
PX086		PX086	GCA_003382915.1	GCF_003382915.1	64187	Xanthomonas oryzae pv. oryzae	oryzae	Philippines	Philippines	Asia	rice	Illumina HiSeq	5015823	Complete Genome	1
PXO112		PXO112	GCA_003294545.1	GCF_003294545.1	64187	Xanthomonas oryzae pv. oryzae	oryzae	Philippines	Philippines	Asia	rice	Illumina HiSeq	4654131	Scaffold	506
PXO145		PXO145	GCA_001746615.1	GCF_001746615.1	64187	Xanthomonas oryzae pv. oryzae	oryzae	Philippines	Philippines	Asia	rice	PacBio	5039763	Complete Genome	1
PXO211		PXO211	GCA_001746635.1	GCF_001746635.1	64187	Xanthomonas oryzae pv. oryzae	oryzae	Philippines	Philippines	Asia	rice	PacBio	5033346	Complete Genome	1
PXO236		PXO236	GCA_001746655.1	GCF_001746655.1	64187	Xanthomonas oryzae pv. oryzae	oryzae	Philippines	Philippines	Asia	rice	PacBio	4968717	Complete Genome	1
PXO282		PXO282	GCA_001746675.1	GCF_001746675.1	64187	Xanthomonas oryzae pv. oryzae	oryzae	Philippines	Philippines	Asia	rice	PacBio	4961996	Complete Genome	1
PXO364		PXO364	GCA_004355805.1	GCF_004355805.1	64187	Xanthomonas oryzae pv. oryzae	oryzae	Philippines	Philippines	Asia	Oryza sativa	PacBio	4904940	Complete Genome	1
PXO404		PXO404	GCA_004355745.1	GCF_004355745.1	64187	Xanthomonas oryzae pv. oryzae	oryzae	Philippines	Philippines	Asia	Oryza sativa	PacBio	4914700	Complete Genome	1
PXO421		PXO421	GCA_004355725.1	GCF_004355725.1	64187	Xanthomonas oryzae pv. oryzae	oryzae	Philippines	Philippines	Asia	Oryza sativa	PacBio	4909962	Complete Genome	1
PXO513		PXO513	GCA_004355705.1	GCF_004355705.1	64187	Xanthomonas oryzae pv. oryzae	oryzae	Philippines	Philippines	Asia	Oryza sativa	PacBio	4915674	Complete Genome	1
PXO524		PXO524	GCA_001746695.1	GCF_001746695.1	64187	Xanthomonas oryzae pv. oryzae	oryzae	Philippines	Philippines	Asia	rice	PacBio	4954304	Complete Genome	1
PXO563		PXO563	GCA_001746715.1	GCF_001746715.1	64187	Xanthomonas oryzae pv. oryzae	oryzae	Philippines	Philippines	Asia	rice	PacBio	4936308	Complete Genome	1
PXO602		PXO602	GCA_001746735.1	GCF_001746735.1	64187	Xanthomonas oryzae pv. oryzae	oryzae	Philippines	Philippines	Asia	rice	PacBio	4951791	Complete Genome	1
PXO61		PXO61	GCA_004355885.3	GCF_004355885.3	64187	Xanthomonas oryzae pv. oryzae	oryzae	Philippines	Philippines	Asia	Oryza sativa	PacBio	4968141	Complete Genome	1
PXO71		PXO71	GCA_001746595.1	GCF_001746595.1	64187	Xanthomonas oryzae pv. oryzae	oryzae	Philippines	Philippines	Asia	rice	PacBio	4906999	Complete Genome	1
PXO83		PXO83	GCA_001518895.1	GCF_001518895.1	64187	Xanthomonas oryzae pv. oryzae	oryzae	Philippines	Philippines	Asia	Oryza sativa cv. IR 26	PacBio	5025428	Complete Genome	1
PXO86		PXO86	GCA_000948075.1	GCF_000948075.1	1458476	Xanthomonas oryzae pv. oryzae PXO86	oryzae PXO86	Philippines	Philippines	Asia	Oryza sativa subsp. indica	Pacific Biosciences	5016623	Complete Genome	1
PXO99A		PXO99A	GCA_000019585.2	GCF_000019585.2	360094	Xanthomonas oryzae pv. oryzae PXO99A	oryzae	Philippines	Philippines	Asia	NA	PacBio	5238555	Complete Genome	1
PXO99A-gx		PXO99A-gx	GCA_020866865.1	GCF_020866865.1	347	Xanthomonas oryzae	NA	China	China	Asia	rice	PacBio Sequel	5028051	Complete Genome	1
RS105		RS105	GCA_001042875.1	GCF_001042875.1	129394	Xanthomonas oryzae pv. oryzicola	oryzicola	China	China	Asia	Oryza sativa	PacBio RS II	4779952	Complete Genome	1
ScHy-b		ScHy-b	GCA_003294525.1	GCF_003294525.1	64187	Xanthomonas oryzae pv. oryzae	oryzae	China	China	Asia	rice	Illumina HiSeq	4552988	Scaffold	437
ScYc-b		ScYc-b	GCA_003932055.1	GCF_003932055.1	64187	Xanthomonas oryzae pv. oryzae	oryzae	China	China	Asia	rice	Illumina HiSeq; PacBio	4865653	Complete Genome	1
SK2-3		SK2-3	GCA_003428965.1	GCF_003428965.1	64187	Xanthomonas oryzae pv. oryzae	oryzae	Thailand	Thailand	Asia	Oryza sativa	PacBio	4934446	Complete Genome	1
SX-85-73		SX-85-73	GCA_003294505.1	GCF_003294505.1	64187	Xanthomonas oryzae pv. oryzae	oryzae	China	China	Asia	rice	Illumina HiSeq	4596367	Scaffold	440
T19		T19	GCA_004355305.1	GCF_004355305.1	64187	Xanthomonas oryzae pv. oryzae	oryzae	Tanzania	Eastern Africa	Africa	Oryza sativa	PacBio RSII	4724318	Complete Genome	1
T7133		T7133	GCA_017577225.1	GCF_017577225.1	64187	Xanthomonas oryzae pv. oryzae	oryzae	Japan	Japan	Asia	rice	PacBio RSII	4978475	Complete Genome	1
Ug11		Ug11	GCA_004355285.1	GCF_004355285.1	64187	Xanthomonas oryzae pv. oryzae	oryzae	Uganda	Eastern Africa	Africa	Oryza sativa	PacBio RSII	4724336	Complete Genome	1
WHRI5234		WHRI 5234	GCA_003064145.1	GCF_003064145.1	129394	Xanthomonas oryzae pv. oryzicola	oryzicola	Malaysia	Malaysia	Asia	Oryza sativa	Illumina MiSeq	4690108	Scaffold	281
X11-5A		X11-5A	GCA_000212755.3	GCF_000212755.2	347	Xanthomonas oryzae	NA	USA	United States	Americas	Oryza sativa cv. Lemont	PacBio Sequel	4952202	Complete Genome	1
XF89b		XF89b	GCA_002023005.1	GCF_002023005.1	64187	Xanthomonas oryzae pv. oryzae	oryzae	Taiwan	Taiwan	Asia	Oryza sativa	454; Illumina; Sanger dideoxy sequencing	4966744	Complete Genome	1
XM9		XM9	GCA_003522605.1	GCF_003522605.1	64187	Xanthomonas oryzae pv. oryzae	oryzae	Taiwan	Taiwan	Asia	Oryza sativa	PacBio	4920509	Complete Genome	1
XZ39		XZ39	GCA_003300225.1	GCF_003300225.1	64187	Xanthomonas oryzae pv. oryzae	oryzae	China	China	Asia	rice	Illumina HiSeq	4524710	Scaffold	489
XZ40		XZ40	GCA_003294495.1	GCF_003294495.1	64187	Xanthomonas oryzae pv. oryzae	oryzae	China	China	Asia	rice	Illumina HiSeq	4507096	Scaffold	477
XZ42		XZ42	GCA_003300215.1	GCF_003300215.1	64187	Xanthomonas oryzae pv. oryzae	oryzae	China	China	Asia	rice	Illumina HiSeq	4517635	Scaffold	487
XZ43		XZ43	GCA_003294465.1	GCF_003294465.1	64187	Xanthomonas oryzae pv. oryzae	oryzae	China	China	Asia	rice	Illumina HiSeq	4512540	Scaffold	511
XZ44		XZ44	GCA_003300125.1	GCF_003300125.1	64187	Xanthomonas oryzae pv. oryzae	oryzae	China	China	Asia	rice	Illumina HiSeq	4517524	Scaffold	495
YC11		YC11	GCA_003382935.1	GCF_003382935.1	64187	Xanthomonas oryzae pv. oryzae	oryzae	China	China	Asia	rice	PacBio	4867200	Complete Genome	1
YC20		YC20	GCA_003300075.1	GCF_003300075.1	64187	Xanthomonas oryzae pv. oryzae	oryzae	China	China	Asia	rice	Illumina HiSeq	4507167	Scaffold	479
YC26		YC26	GCA_003294445.1	GCF_003294445.1	64187	Xanthomonas oryzae pv. oryzae	oryzae	China	China	Asia	rice	Illumina HiSeq	4494404	Scaffold	479
YC3		YC3	GCA_003294425.1	GCF_003294425.1	64187	Xanthomonas oryzae pv. oryzae	oryzae	China	China	Asia	rice	Illumina HiSeq	4483312	Scaffold	473
YC36		YC36	GCA_003300055.1	GCF_003300055.1	64187	Xanthomonas oryzae pv. oryzae	oryzae	China	China	Asia	rice	Illumina HiSeq	4506330	Scaffold	480
YM15		YM15	GCA_001021915.1	GCF_001021915.1	129394	Xanthomonas oryzae pv. oryzicola	oryzicola	China	China	Asia	rice	Illumina	4430829	Complete Genome	1
YN01		YN01	GCA_022406815.1	GCF_022406815.1	129394	Xanthomonas oryzae pv. oryzicola	NA	China	China	Asia	NA	PacBio Sequel	4702162	Complete Genome	1
YN03-02		YN03-02	GCA_003300065.1	GCF_003300065.1	64187	Xanthomonas oryzae pv. oryzae	oryzae	China	China	Asia	rice	Illumina HiSeq	4557562	Scaffold	449
YN03-03		YN03-03	GCA_003299955.1	GCF_003299955.1	64187	Xanthomonas oryzae pv. oryzae	oryzae	China	China	Asia	rice	Illumina HiSeq	4588946	Scaffold	446
YN03-04		YN03-04	GCA_003294405.1	GCF_003294405.1	64187	Xanthomonas oryzae pv. oryzae	oryzae	China	China	Asia	rice	Illumina HiSeq	4540880	Scaffold	428
YN03-06		YN03-06	GCA_003294385.1	GCF_003294385.1	64187	Xanthomonas oryzae pv. oryzae	oryzae	China	China	Asia	rice	Illumina HiSeq	4540850	Scaffold	412
YN03-10		YN03-10	GCA_003299865.1	GCF_003299865.1	64187	Xanthomonas oryzae pv. oryzae	oryzae	China	China	Asia	rice	Illumina HiSeq	4598014	Scaffold	444
YN03-11		YN03-11	GCA_003294365.1	GCF_003294365.1	64187	Xanthomonas oryzae pv. oryzae	oryzae	China	China	Asia	rice	Illumina HiSeq	4538177	Scaffold	419
YN03-14		YN03-14	GCA_003299755.1	GCF_003299755.1	64187	Xanthomonas oryzae pv. oryzae	oryzae	China	China	Asia	rice	Illumina HiSeq	4627966	Scaffold	449
YN03-15		YN03-15	GCA_003294345.1	GCF_003294345.1	64187	Xanthomonas oryzae pv. oryzae	oryzae	China	China	Asia	rice	Illumina HiSeq	4517200	Scaffold	417
YN03-16		YN03-16	GCA_003294335.1	GCF_003294335.1	64187	Xanthomonas oryzae pv. oryzae	oryzae	China	China	Asia	rice	Illumina HiSeq	4621780	Scaffold	492
YN03-18		YN03-18	GCA_003294295.1	GCF_003294295.1	64187	Xanthomonas oryzae pv. oryzae	oryzae	China	China	Asia	rice	Illumina HiSeq	4507094	Scaffold	417
YN03-20		YN03-20	GCA_003299745.1	GCF_003299745.1	64187	Xanthomonas oryzae pv. oryzae	oryzae	China	China	Asia	rice	Illumina HiSeq	4500923	Scaffold	471
YN04-5		YN04-5	GCA_003299635.1	GCF_003299635.1	64187	Xanthomonas oryzae pv. oryzae	oryzae	China	China	Asia	rice	Illumina HiSeq	4551307	Scaffold	473
YN06		YN06	GCA_003299625.1	GCF_003299625.1	64187	Xanthomonas oryzae pv. oryzae	oryzae	China	China	Asia	rice	Illumina HiSeq	4521768	Scaffold	510
YN1		YN1	GCA_002895745.1	GCF_002895745.1	64187	Xanthomonas oryzae pv. oryzae	oryzae	China	China	Asia	rice	Illumina HiSeq	4261503	Contig	478
YN11		YN11	GCA_003299525.1	GCF_003299525.1	64187	Xanthomonas oryzae pv. oryzae	oryzae	China	China	Asia	rice	Illumina HiSeq	4328543	Scaffold	556
YN16		YN16	GCA_003299275.1	GCF_003299275.1	64187	Xanthomonas oryzae pv. oryzae	oryzae	China	China	Asia	rice	Illumina HiSeq	4543965	Scaffold	419
YN18		YN18	GCA_002895805.1	GCF_002895805.1	64187	Xanthomonas oryzae pv. oryzae	oryzae	China	China	Asia	rice	Illumina HiSeq	4315371	Scaffold	544
YN24		YN24	GCA_002895825.1	GCF_002895825.1	64187	Xanthomonas oryzae pv. oryzae	oryzae	China	China	Asia	rice	Illumina HiSeq	4475527	Scaffold	389
YN39		YN39	GCA_003299145.1	GCF_003299145.1	64187	Xanthomonas oryzae pv. oryzae	oryzae	China	China	Asia	rice	Illumina HiSeq	4560735	Scaffold	490
ZJ05		ZJ05	GCA_003299055.1	GCF_003299055.1	64187	Xanthomonas oryzae pv. oryzae	oryzae	China	China	Asia	rice	Illumina HiSeq	4545163	Scaffold	439
ZJ25		ZJ25	GCA_003294085.1	GCF_003294085.1	64187	Xanthomonas oryzae pv. oryzae	oryzae	China	China	Asia	rice	Illumina HiSeq	4606807	Scaffold	433
ZJ27		ZJ27	GCA_003298965.1	GCF_003298965.1	64187	Xanthomonas oryzae pv. oryzae	oryzae	China	China	Asia	rice	Illumina HiSeq	4566743	Scaffold	475
ZJ28		ZJ28	GCA_003298825.1	GCF_003298825.1	64187	Xanthomonas oryzae pv. oryzae	oryzae	China	China	Asia	rice	Illumina HiSeq	4596744	Scaffold	492

## Sheet: Details iTz strain sequncing
cix_id	country	subregion	continent	ird_stn_label	species	pathovar	ncbi_accession	circular	assembler	contig_count	flow_cell_type	ONT_mean_read_depth	Illumina_mean_read_depth	polypolish_contig_length	BuscoCompleteRatio	BuscoFragmentedRatio	BuscoMissingRatio
CIX4462	Tanzania	Eastern Africa	Africa	iTzDak19-3	X. oryzae	oryzae	GCA_029204285.1	TRUE	FLYE	1	FLO-MIN111	88.3797	110.2	5150745	0.987847	0.00434028	0.0078125
CIX4506	Tanzania	Eastern Africa	Africa	iTzLuk21-1	X. oryzae	oryzae	GCA_029204265.1	TRUE	FLYE	1	FLO-MIN111	46.1166	94.9	5109772	0.987847	0.00434028	0.0078125
CIX4509	Tanzania	Eastern Africa	Africa	iTzLuk21-2	X. oryzae	oryzae	GCA_029204245.1	TRUE	FLYE	1	FLO-MIN111	100.265	39.1	5144900	0.987847	0.00434028	0.0078125
CIX4457	Tanzania	Eastern Africa	Africa	iTzDak19-1	X. oryzae	oryzae	GCA_030033735.1	FALSE	FLYE	3	FLO-MIN111	19.5458|18.8693|21.4163	102.3|97.9|87.8	2626594|2503893|45054	0.987847	0.00434028	0.0078125
CIX4458	Tanzania	Eastern Africa	Africa	iTzDak19-2	X. oryzae	oryzae	GCA_030033715.1	FALSE	FLYE	2	FLO-MIN111	94.7535|91.2313	87.8|89.4	4319088|810579	0.985243	0.00607639	0.00868056
CIX4505	Tanzania	Eastern Africa	Africa	iTzDak21-3	X. oryzae	oryzae	GCA_030033655.1	FALSE	FLYE	2	FLO-MIN111	83.2411|82.0629	130.1|127.5	4328729|810573	0.986111	0.00607639	0.0078125
CIX4508	Tanzania	Eastern Africa	Africa	iTzLuk21-5	X. oryzae	oryzae	GCA_030056695.1	FALSE	FLYE	2	FLO-MIN111	85.7563|81.5034	72.9|72.5	4321040|810648	0.986979	0.00520833	0.0078125
CIX4507	Tanzania	Eastern Africa	Africa	iTzLuk21-4	X. oryzae	oryzae	GCA_029224685.1	FALSE	FLYE	1	FLO-MIN111	40.5954	85.7	5134570	0.986979	0.00520833	0.0078125
