# Supplementary material for: Genome editing of an African elite rice variety confers resistance against endemic and emerging Xanthomonas oryzae pv. oryzae strains
Source: eLife. 2023 Jun 20;12:e84864. doi: 10.7554/eLife.84864 (PMC10322153; doi:10.7554/eLife.84864)
Supplement: Supplementary file 3. [file elife-84864-supp3.xlsx]

## Sheet: Feuil1
CIX_ID	Strain_label	NCBI_accession	Putative_tale_ID	Start	End	Strand	RVD_sequence	N-terminal domain_length	C-terminal domain length	Putative_iTALe
CIX4462	iTzDak19-3	CP101704	ROI_00008	4011800	4015414	+	HD-HD-NG-N*-NN-HG-HD-N*-NI-NI-NN-HD-HI-ND-HD-NI-HD-NG-NG	288	286	FALSE
CIX4506	iTzLuk21-1	CP101703	ROI_00008	3969487	3973101	+	HD-HD-NG-N*-NN-HG-HD-N*-NI-NI-NN-HD-HI-ND-HD-NI-HD-NG-NG	288	286	FALSE
CIX4509	iTzLuk21-2	CP101703	ROI_00008	4005986	4009600	+	HD-HD-NG-N*-NN-HG-HD-N*-NI-NI-NN-HD-HI-ND-HD-NI-HD-NG-NG	288	286	FALSE
CIX4462	iTzDak19-3	CP101704	ROI_00009	4016404	4020855	+	HD-HD-NN-NN-NG-NG-HD-NS-HG-HD-NG-N*-HD-HD-HD-N*-NN-ni-NN-HD-HI-ND-HD-HG-NN-HG-N*	288	286	FALSE
CIX4506	iTzLuk21-1	CP101703	ROI_00009	3974091	3978542	+	HD-HD-NN-NN-NG-NG-HD-NS-HG-HD-NG-N*-HD-HD-HD-N*-NN-ni-NN-HD-HI-ND-HD-HG-NN-HG-N*	288	286	FALSE
CIX4509	iTzLuk21-2	CP101703	ROI_00009	4010590	4015041	+	HD-HD-NN-NN-NG-NG-HD-NS-HG-HD-NG-N*-HD-HD-HD-N*-NN-ni-NN-HD-HI-ND-HD-HG-NN-HG-N*	288	286	FALSE
CIX4462	iTzDak19-3	CP101704	ROI_00002	2477862	2481884	+	NI-H*-NI-NN-NN-NN-NN-NN-HD-NI-NS-HG-HD-NI-N*-NS-NI-NI-HG-HD-NS-NS-NG	288	286	FALSE
CIX4509	iTzLuk21-2	CP101703	ROI_00002	2469964	2473986	+	NI-H*-NI-NN-NN-NN-NN-NN-HD-NI-NS-HG-HD-NI-N*-NS-NI-NI-HG-HD-NS-NS-NG	288	286	FALSE
CIX4462	iTzDak19-3	CP101704	ROI_00006	3205818	3210247	+	NI-HG-NI-HD-NI-NG-NN-HD-HG-HD-NI-NI-NN-NI-HD-HD-HD-HG-NN-NN-HD-NS-NN-HD-N*-NS-N*	240	286	FALSE
CIX4506	iTzLuk21-1	CP101703	ROI_00006	3206874	3211304	+	NI-HG-NI-HD-NI-NG-NN-HD-HG-HD-NI-NI-NN-NI-HD-HD-HD-HG-NN-NN-HD-NS-NN-HD-N*-NS-N*	288	286	FALSE
CIX4509	iTzLuk21-2	CP101703	ROI_00006	3200016	3204446	+	NI-HG-NI-HD-NI-NG-NN-HD-HG-HD-NI-NI-NN-NI-HD-HD-HD-HG-NN-NN-HD-NS-NN-HD-N*-NS-N*	288	286	FALSE
CIX4462	iTzDak19-3	CP101704	ROI_00016	2444043	2447900	-	NI-HG-NI-HG-NI-NI-NI-HD-NN-HD-NS-NG-SS-HD-NI-NI-NN-NI-NN-NI-NG	288	297	FALSE
CIX4506	iTzLuk21-1	CP101703	ROI_00016	2444054	2447911	-	NI-HG-NI-HG-NI-NI-NI-HD-NN-HD-NS-NG-SS-HD-NI-NI-NN-NI-NN-NI-NG	288	297	FALSE
CIX4509	iTzLuk21-2	CP101703	ROI_00016	2444055	2447911	-	NI-HG-NI-HG-NI-NI-NI-HD-NN-HD-NS-NG-SS-HD-NI-NI-NN-NI-NN-NI-NG	240	297	FALSE
CIX4462	iTzDak19-3	CP101704	ROI_00015	2152547	2156065	-	NI-HG-NI-NI-NI-NN-HD-NS-NN-NS-NN-HD-NN-NI-HD-NN-NS-NG	288	286	FALSE
CIX4506	iTzLuk21-1	CP101703	ROI_00015	2152556	2156074	-	NI-HG-NI-NI-NI-NN-HD-NS-NN-NS-NN-HD-NN-NI-HD-NN-NS-NG	288	286	FALSE
CIX4509	iTzLuk21-2	CP101703	ROI_00015	2152559	2156075	-	NI-HG-NI-NI-NI-NN-HD-NS-NN-NS-NN-HD-NN-NI-HD-NN-NS-NG	240	286	FALSE
CIX4462	iTzDak19-3	CP101704	ROI_00007	3211237	3215562	+	NI-HG-NN-HD-NI-NG-HD-NG-N*-HD-HD-NI-NG-NG-NI-HD-NG-NN-NG-NI-NI-NI-NI-N*-NS-N*	288	286	FALSE
CIX4506	iTzLuk21-1	CP101703	ROI_00007	3212294	3216619	+	NI-HG-NN-HD-NI-NG-HD-NG-N*-HD-HD-NI-NG-NG-NI-HD-NG-NN-NG-NI-NI-NI-NI-N*-NS-N*	288	286	FALSE
CIX4509	iTzLuk21-2	CP101703	ROI_00007	3205436	3209761	+	NI-HG-NN-HD-NI-NG-HD-NG-N*-HD-HD-NI-NG-NG-NI-HD-NG-NN-NG-NI-NI-NI-NI-N*-NS-N*	288	286	FALSE
CIX4462	iTzDak19-3	CP101704	ROI_00017	2448890	2452602	-	NI-N*-NI-NS-NN-NG-NN-NS-N*-NS-NN-NS-N*-HD-HG-HD-NI-HD-HD-NG	240	286	FALSE
CIX4506	iTzLuk21-1	CP101703	ROI_00017	2448901	2452614	-	NI-N*-NI-NS-NN-NG-NN-NS-N*-NS-NN-NS-N*-HD-HG-HD-NI-HD-HD-NG	288	286	FALSE
CIX4509	iTzLuk21-2	CP101703	ROI_00017	2448901	2452612	-	NI-N*-NI-NS-NN-NG-NN-NS-N*-NS-NN-NS-N*-HD-HG-HD-NI-HD-HD-NG	240	286	FALSE
CIX4462	iTzDak19-3	CP101704	ROI_00014	603192	607109	-	NI-NG-NI-NI-N*-NN-HD-HD-N*-NI-NI-NI-NG-HD-HG-NN-NS-NN-HD-HD-NG-N*	288	286	FALSE
CIX4506	iTzLuk21-1	CP101703	ROI_00014	603196	607114	-	NI-NG-NI-NI-N*-NN-HD-HD-N*-NI-NI-NI-NG-HD-HG-NN-NS-NN-HD-HD-NG-N*	240	286	FALSE
CIX4509	iTzLuk21-2	CP101703	ROI_00014	603196	607113	-	NI-NG-NI-NI-N*-NN-HD-HD-N*-NI-NI-NI-NG-HD-HG-NN-NS-NN-HD-HD-NG-N*	288	286	FALSE
CIX4462	iTzDak19-3	CP101704	ROI_00010	4021845	4025255	+	NI-NN-N*-NG-NS-NN-NN-NN-NI-NN-NI-N*-HD-HD-NI-NG-NG	288	286	FALSE
CIX4506	iTzLuk21-1	CP101703	ROI_00010	3979532	3982941	+	NI-NN-N*-NG-NS-NN-NN-NN-NI-NN-NI-N*-HD-HD-NI-NG-NG	240	286	FALSE
CIX4509	iTzLuk21-2	CP101703	ROI_00010	4016031	4019441	+	NI-NN-N*-NG-NS-NN-NN-NN-NI-NN-NI-N*-HD-HD-NI-NG-NG	288	286	FALSE
CIX4462	iTzDak19-3	CP101704	ROI_00011	4026245	4029252	+	NI-NN-NI-HG-HG-HD-NG-HD-HG-HD-HD-HD-NG	240	286	FALSE
CIX4506	iTzLuk21-1	CP101703	ROI_00011	3983931	3986939	+	NI-NN-NI-HG-HG-HD-NG-HD-HG-HD-HD-HD-NG	288	286	FALSE
CIX4509	iTzLuk21-2	CP101703	ROI_00011	4020431	4023439	+	NI-NN-NI-HG-HG-HD-NG-HD-HG-HD-HD-HD-NG	288	286	FALSE
CIX4462	iTzDak19-3	CP101704	ROI_00004	2748559	2751873	+	NI-NN-NN-NI-NI-NI-HD-NS-HG-NN-NN-NN-NI-NI-HG-HD	288	286	FALSE
CIX4506	iTzLuk21-1	CP101703	ROI_00004	2748568	2751881	+	NI-NN-NN-NI-NI-NI-HD-NS-HG-NN-NN-NN-NI-NI-HG-HD	240	286	FALSE
CIX4509	iTzLuk21-2	CP101703	ROI_00004	2741712	2745026	+	NI-NN-NN-NI-NI-NI-HD-NS-HG-NN-NN-NN-NI-NI-HG-HD	288	286	FALSE
CIX4462	iTzDak19-3	CP101704	ROI_00001	2473577	2476872	+	NI-NS-HD-HG-NS-NN-HD-H*-NG-NN-NN-HD-HD-HD-HD-NG	235	286	FALSE
CIX4506	iTzLuk21-1	CP101703	ROI_00001	2473589	2476883	+	NI-NS-HD-HG-NS-NN-HD-H*-NG-NN-NN-HD-HD-HD-HD-NG	235	286	FALSE
CIX4509	iTzLuk21-2	CP101703	ROI_00001	2465678	2468974	+	NI-NS-HD-HG-NS-NN-HD-H*-NG-NN-NN-HD-HD-HD-HD-NG	283	286	FALSE
CIX4462	iTzDak19-3	CP101704	ROI_00005	3201211	3204828	+	NI-NS-HD-HG-NS-NN-HD-H*-NG-NN-NN-HD-HD-NG-HD-NI-NG-NS-NG	288	286	FALSE
CIX4506	iTzLuk21-1	CP101703	ROI_00005	3202269	3205884	+	NI-NS-HD-HG-NS-NN-HD-H*-NG-NN-NN-HD-HD-NG-HD-NI-NG-NS-NG	240	286	FALSE
CIX4509	iTzLuk21-2	CP101703	ROI_00005	3195409	3199026	+	NI-NS-HD-HG-NS-NN-HD-H*-NG-NN-NN-HD-HD-NG-HD-NI-NG-NS-NG	288	286	FALSE
CIX4462	iTzDak19-3	CP101704	ROI_00012	4030242	4034368	+	NN-HD-NS-NG-HD-NN-N*-NI-HD-NS-HD-NN-HD-NN-HD-NN-NN-NN-NN-NN-NN-NN-HD-NG	240	286	FALSE
CIX4506	iTzLuk21-1	CP101703	ROI_00012	3987929	3992054	+	NN-HD-NS-NG-HD-NN-N*-NI-HD-NS-HD-NN-HD-NN-HD-NN-NN-NN-NN-NN-NN-NN-HD-NG	240	286	FALSE
CIX4509	iTzLuk21-2	CP101703	ROI_00012	4024429	4028556	+	NN-HD-NS-NG-HD-NN-N*-NI-HD-NS-HD-NN-HD-NN-HD-NN-NN-NN-NN-NN-NN-NN-HD-NG	288	286	FALSE
CIX4462	iTzDak19-3	CP101704	ROI_00013	485453	488367	-	NS-NS-HD-ng-NG-NG-HD-HD-NG-HD-HD-NG-HD-N*	230	184	TRUE
CIX4506	iTzLuk21-1	CP101703	ROI_00013	485457	488371	-	NS-NS-HD-ng-NG-NG-HD-HD-NG-HD-HD-NG-HD-N*	230	184	TRUE
CIX4509	iTzLuk21-2	CP101703	ROI_00013	485458	488372	-	NS-NS-HD-ng-NG-NG-HD-HD-NG-HD-HD-NG-HD-N*	230	184	TRUE
CIX4462	iTzDak19-3	CP101704	ROI_00018	2993723	2996331	-	NS-NS-HD-ng-NG-NG-HD-HD-NG-HD-N*	230	184	TRUE
CIX4506	iTzLuk21-1	CP101703	ROI_00018	2994785	2997393	-	NS-NS-HD-ng-NG-NG-HD-HD-NG-HD-N*	230	184	TRUE
CIX4509	iTzLuk21-2	CP101703	ROI_00018	2987930	2990538	-	NS-NS-HD-ng-NG-NG-HD-HD-NG-HD-N*	230	184	TRUE
Features of loci encoding putative full-length TALe in the genome of strains iTzDak19-3, iTzLuk21-1 and iTzLuk21-2.
Rows correspond to individual loci that are characterized by their genome of origin, their position on the chromosome, the expected RVD sequence of the corresponding TALe protein, the predicted length of their N- and C-terminal domains (outside of the central repeat domain) as well as whether they are predicted to act as iTALEs. PthXo1B is indicated in bold.
